# Supplementary material
Source: Springer Nature journal article supplement (https://www.springerprofessional.de/resource/supplementary/13638_2011_296_MOESM18_ESM.pdf/11897508)
Supplement: MOESM18 [file 11897508]

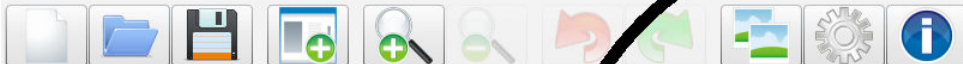

1. Configure floor plan, networks and requirements

2. Run coverage tools

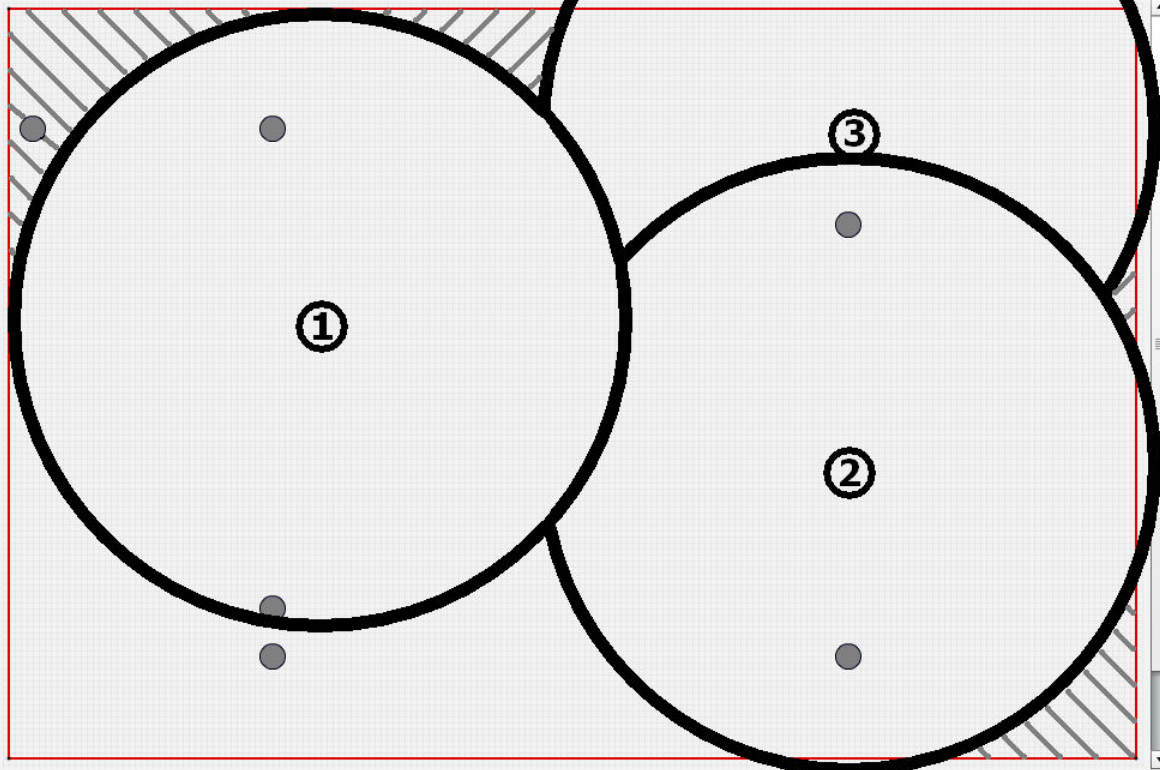

## Coverage Tools

Common Settings

Predict Coverage

Optimal Placement

Symbio Selection

Export Raw Data

Show Legends

## Common Settings

## Configure Receivers

Redpine

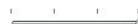

Grid: 2 m

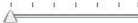

Elevation: 1 m

## Configure Margins

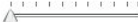

Interference: 0 dB

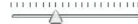

Shadowing: 7 dB

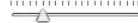

Fading: 5 dB
